# Supplementary material for: MUC1-C induces DNA methyltransferase 1 and represses tumor suppressor genes in acute myeloid leukemia
Source: PubMed Central journal article supplement (PMC5129907; doi:10.18632/oncotarget.9777), 2016-06-01
Supplement: oncotarget-07-38974-s001.pdf [file oncotarget-07-38974-s001.pdf]

# MUC1-C induces DNA methyltransferase 1 and represses tumor suppressor genes in acute myeloid leukemia

## Supplemental Material

### A. MOLM-14

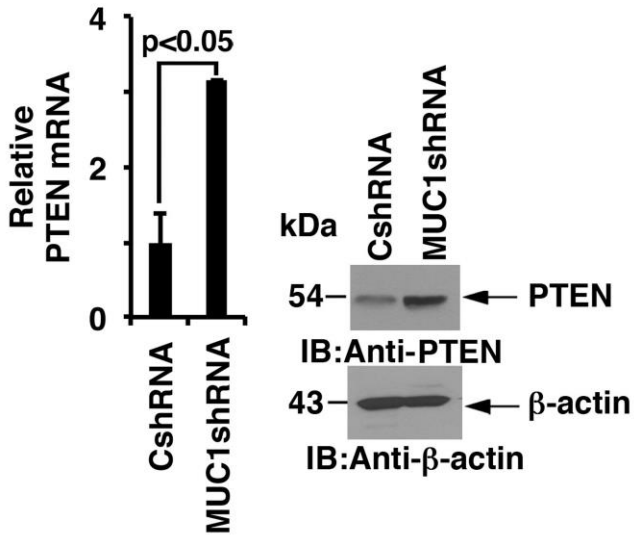

### B. MOLM-14

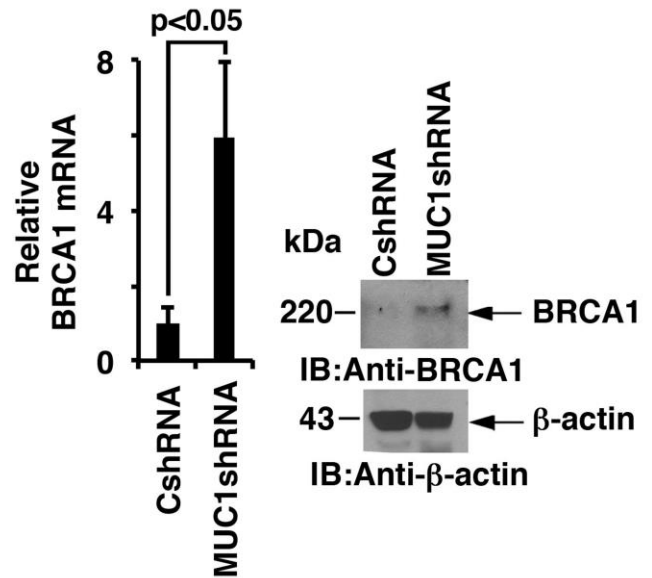

**Supplemental Fig. S1. Silencing MUC1-C derepresses PTEN and BRCA1 expression in MOLM-14 cells.** (A and B) The indicated MOLM-14 cells were analyzed for PTEN (A) and BRCA1 (B) mRNA levels by qRT-PCR (left). The results are expressed as a relative mRNA levels (mean $\pm$ SD of three determinations) as compared to that obtained with CshRNA cells (assigned a value of 1). Lysates from MOLM-14/CshRNA and MOLM-14/MUC1shRNA cells were immunoblotted for indicated antibodies (right).

**Supplemental Table S1. Primers used for qRT-PCR.**

|                |                                    |
|----------------|------------------------------------|
| DNMT1          | Fwd: 5'-CCCAAGTAACTGGGATTAGAGC-3'  |
| DNMT1          | Rev: 5'-GGTTTGCCTGGTGCTTTTC-3'     |
| E-cadherin     | Fwd: 5'-GAAGGTGACAGAGCCTCTGGAT-3'  |
| E-cadherin     | Rev: 5'-GATCGGTTACCGTGATCAAAATC-3' |
| BRCA1          | Fwd: 5'-GCGTCCCCTCACAAATAAAT-3'    |
| BRCA1          | Rev: 5'-CTTGACCATTCTGCTCCGTT-3'    |
| PTEN           | Fwd: 5'-AAGGGACGAACTGGTGTAATG-3'   |
| PTEN           | Rev: 5'-GCCTCTGACTGGGAATAGTTA-3'   |
| $\beta$ -actin | Fwd: 5'-TTCTACAATGAGCTGCGTGTG-3'   |
| $\beta$ -actin | Rev: 5'-GGGGTGTGAAGGTCTCAA-3'      |

**Supplemental Table S2. Primers used for ChIP and MeDIP qPCR.**

|              |                                      |
|--------------|--------------------------------------|
| <i>DNMT1</i> | Fwd: 5' -GCTAGGATTACAGGTGTGTGTC-3'   |
| <i>DNMT1</i> | Rev: 5' -GATCGCTTGAGGTTAGGAGTTC-3'   |
| <i>CDH1</i>  | Fwd: 5' -CTTTCTGATCCCAGGTCTTAGTG-3'  |
| <i>CDH1</i>  | Rev: 5' -TAGGGTCTAGGTGGGTTATGG-3'    |
| <i>GAPDH</i> | Fwd: 5' -TACTAGCGGTTTTACGGGCG-3'     |
| <i>GAPDH</i> | Rev: 5' -TCGAACAGGAGGAGCAGAGAGCGA-3' |
